# Supplementary material
Source: MDPI journal article supplement (https://www.mdpi.com/2673-7426/2/1/6)
Supplement: s1 [file s1]

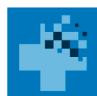

# Supplementary Materials: Predicting and Visualizing STK11 Mutation in Lung Adenocarcinoma Histopathology Slides Using Deep Learning

Runyu Hong, Wenke Liu and David Fenyo

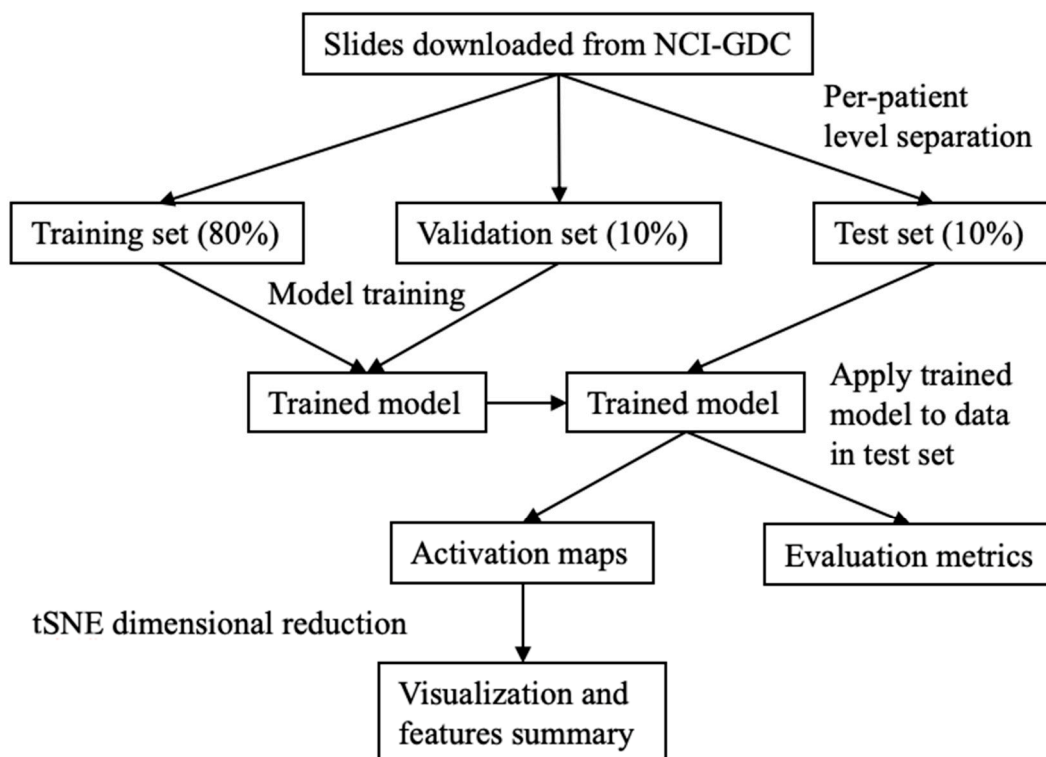

Figure S1. general workflow.
